# Supplementary material for: Ferrocenyl methylene units and copper(ii) phenanthroline complex units anchored on branched poly(ethyleneimine) – DNA binding, antimicrobial and anticancer activity
Source: Royal Society of Chemistry journal article supplement (doi:10.1039/c4nj00460d), 2014-01-01
Supplement: c4nj00460d1.pdf [file c4nj00460d1.pdf]

Electronic Supporting Information

## Ferrocenyl methylene units and copper(II) phenanthroline complex units anchored on branched poly(ethyleneimine) – DNA binding, antimicrobial and anticancer activity†

Ilayaperumal Pradeep,<sup>a</sup> Sengan Megarajan,<sup>a</sup> Sankaralingam Arunachalam,<sup>\*a</sup> Rajakumar Dhivya,<sup>b</sup> Annadurai Vinothkanna,<sup>c</sup> Mohammad Abdulkadher Akbarsha,<sup>b</sup> and Soundarapandian Sekar,<sup>c</sup>

Table of contents:

| S.No | Title                                        |
|------|----------------------------------------------|
| 1    | Degree of coordination                       |
| 2    | IR Spectrum                                  |
| 3    | EDAX Spectrum                                |
| 4    | Fluorescence -K <sub>sv</sub> plot           |
| 5    | Fluorescence - Double logarithmic plot       |
| 6    | Cyclic voltammetry – Binding constant plot   |
| 7    | Cytological changes diagram                  |
| 8    | Antimicrobial studies (Disk Diffusion Assay) |

### Degree of coordination

We analysed the Cu and Fe weight percentages at ppm level various concentration solutions of the polymer conjugates by the Atomic absorption spectroscopy. We have calculated the concentration of Cu(II) complex units and Ferrocene units.

From the concentration we calculated the degree of coordination

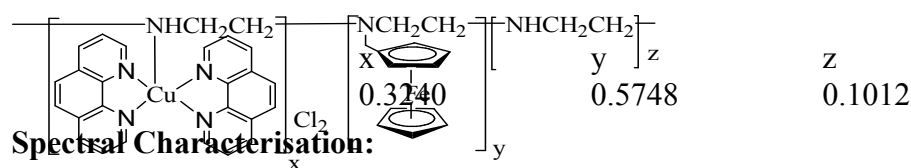

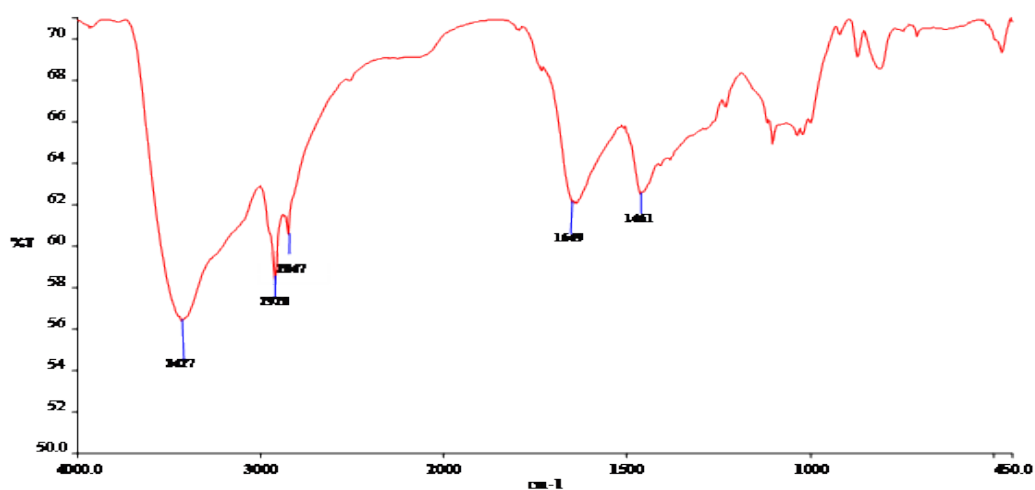

Fig. S1. IR spectrum of the Polymer conjugate

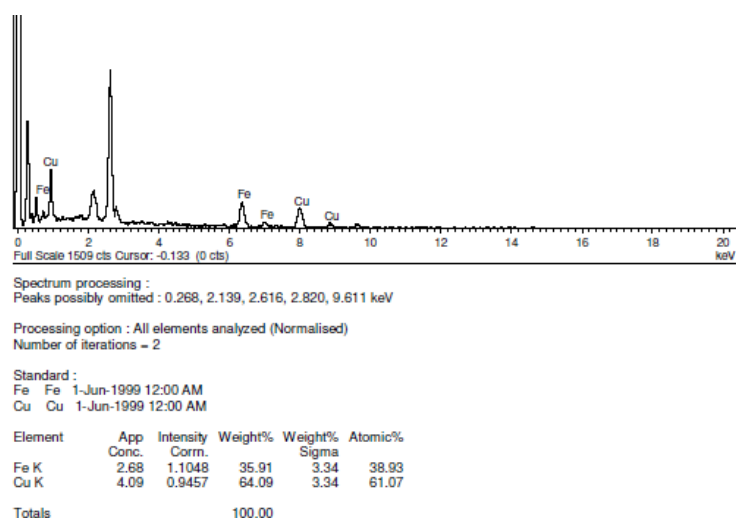

Fig. S2. Edax spectrum of the polymer conjugate.

Edax spectrum shows the Cu and Fe weight percentages it concludes both metals present in the polymer conjugates.

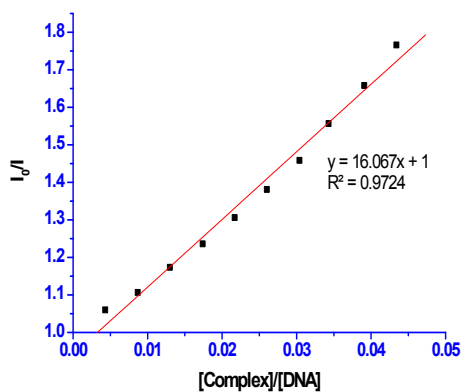

Fig. S3. Plot of  $I/I_0$  against  $[\text{Complex}]/[\text{DNA}]$  using fluorescence results for the  $K_{sv}$  of the Cu(II) complex in polymer conjugates with CT-DNA.

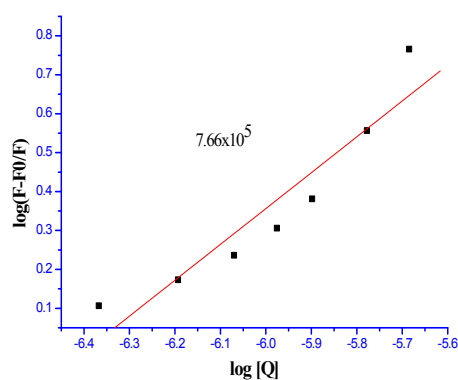

Fig. S4. Plot of  $\log[Q]$  against  $\log(F-F_0/F)$  using fluorescence results for the binding constant of the Cu(II) complex in polymer conjugates with CT-DNA.

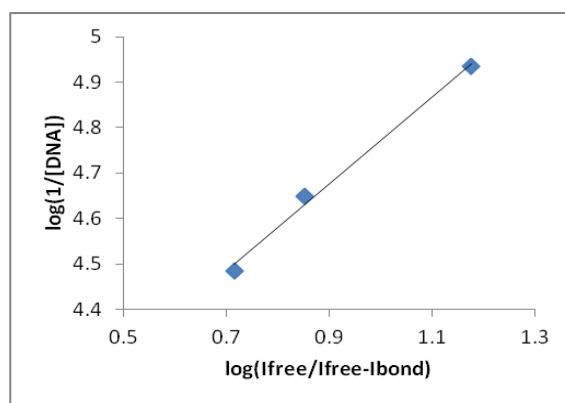

Fig. S5. Plot of  $\log(1/[\text{DNA}])$  against  $\log(I_{\text{Free}}/(I_{\text{Free}} - I_{\text{bond}}))$  using DPV results for the binding constant of Cu(II) complex in polymer conjugates with CT-DNA.

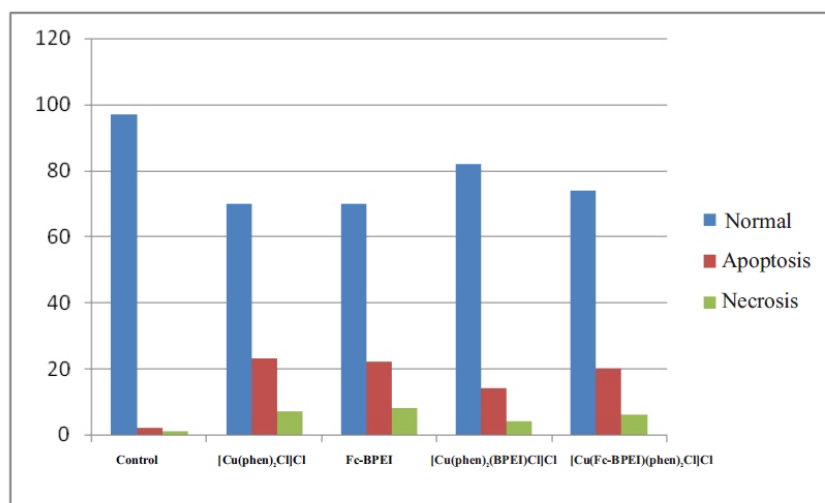

Fig. S6. Cytological changes diagram.

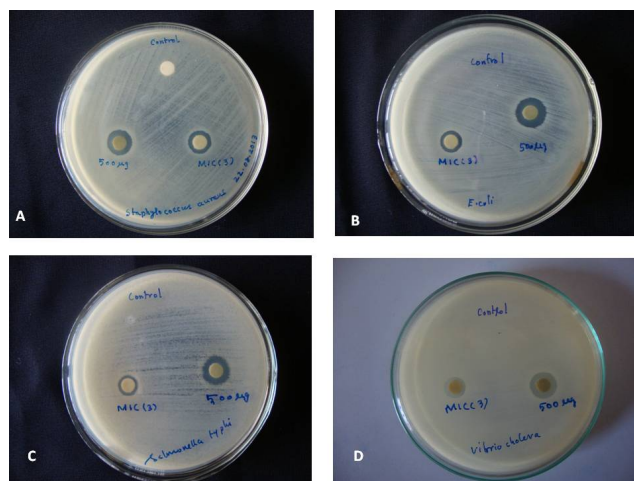

Fig. S7. *in vitro* Antimicrobial studies of selected four pathogens.
